# Supplementary material
Source: Springer Nature journal article supplement (https://www.springermedizin.de/resource/supplementary/13256_2010_1502_MOESM2_ESM.pdf/9647796)

Sc 6  
FFE/M  
SI 13  
Ec 2

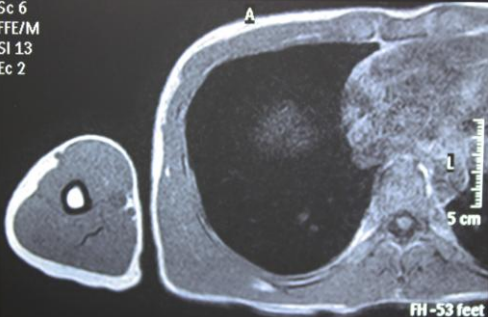

Supplement: MOESM2 [file 9647796]
